# Supplementary material for: Inhibition of Th17 Cells Regulates Autoimmune Diabetes in NOD Mice
Source: Oxford University Press journal article supplement (doi:10.2337/db08-1113), 2009-03-16
Supplement: db081113-sup-supplemental_figure_a1.doc [file db081113-sup-supplemental_figure_a1.doc]

**Supplemental Figure A1: Recombinant IL-25 can be detected in the serum up to 3 hours following a single 1 µg injection.** To determine the serum distribution of IL-25 following S.C. injection, naïve NOD mice were injected with 1 µg IL-25 S.C., and serum was collected via tail vein bleeding at 0 min, 15 min, 30 min, 1 hour, 2 hours, 3 hours, 6 hours, 12 hours, and 24 hours. Serum samples were analyzed using an IL-25 ELISA according to the manufacturer’s instructions (R&D Systems).

**
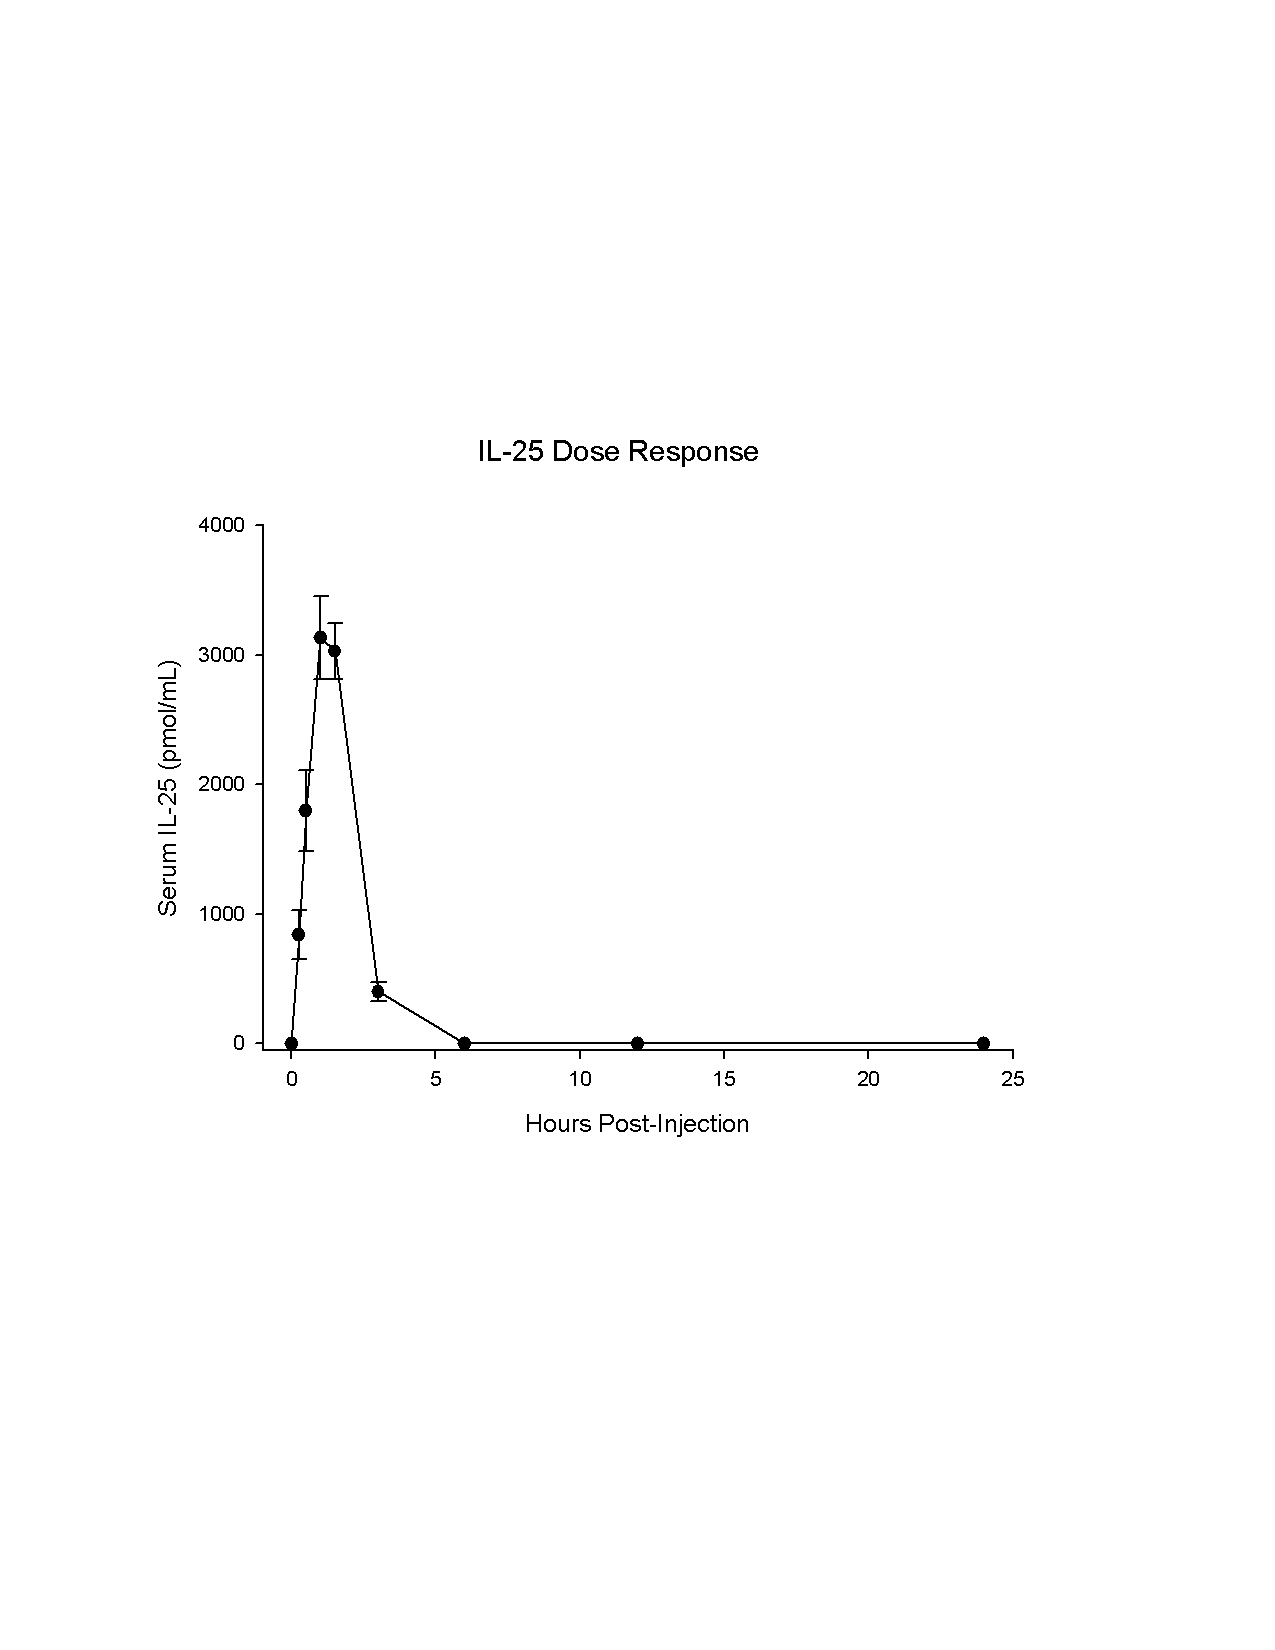
**
